# Supplementary material
Source: PubMed Central journal article supplement (PMC4887167)
Supplement: JCI84940.sd.pdf [file JCI84940.sd.pdf]

Supplemental Table 1: Estimated tumor purity, allele frequency, and independent read depth for all gene mutations classified as either potentially pathogenic or VUS in the metastatic and primary tumor samples.<sup>A</sup>

| Sample        | Sample Metrics |           |            |                |                      |            |        |
|---------------|----------------|-----------|------------|----------------|----------------------|------------|--------|
|               |                | Gene      | CDS Effect | Protein Effect | Allele Frequency (%) | Read Depth | Ploidy |
| LN Metastasis | Tumor Purity   |           |            |                |                      |            |        |
|               | Computational  | Pathology |            |                |                      |            |        |
|               | 80%            | 60%       |            |                |                      |            |        |
|               |                | ARID1A    | 5965C>T    | R1989*         | 53.0                 | 585        | 3      |
|               |                | ATR       | 2965C>T    | R989C          | 42.0                 | 383        | %      |
|               |                | ATRX      | 3892G>T    | E1298*         | 6.0                  | 343        | N/A    |
|               |                | BAP1      | 901G>A     | A301T          | 52.0                 | 379        | 3      |
|               |                | CTNNB1    | 95A>G      | D32G           | 55.0                 | 559        | 3      |
|               |                | ERBB3     | 310G>T     | V104L          | 53.0                 | 510        | 3      |
|               |                | ESR1      | 1556A>G    | N519S          | 15.0                 | 559        | 5      |
|               |                | FAM123B   | 674G>T     | R225I          | 66.0                 | 298        | N/A    |
|               |                | LRP1B     | 628A>C     | N210H          | 48.0                 | 354        | 3      |
|               |                | MAP2K1    | 199G>A     | D67N           | 30.0                 | 608        | 3      |
|               |                | MSH6      | 2765G>A    | R922Q          | 49.0                 | 515        | 3      |
|               |                | PIK3CA    | 263G>A     | R88Q           | 42.0                 | 666        | 4      |
|               |                | PIK3CA    | 333G>T     | K111N          | 40.0                 | 596        | 4      |
|               |                | PIK3CA    | 1070G>A    | R357Q          | 34.0                 | 350        | 4      |
|               |                | POLE      | 1231G>T    | V411L          | 50.0                 | 337        | 3      |
|               |                | PTEN      | 389G>A     | R130Q          | 44.0                 | 685        | 4      |
|               |                | SDHA      | 223C>T     | R75*           | 25.0                 | 426        | 3      |
|               |                | SMAD2     | 962G>A     | R321Q          | 36.0                 | 516        | 5      |
|               |                | TAF1      | 3698G>A    | R1233Q         | 71.0                 | 452        | N/A    |
|               |                | TP53      | 637C>T     | R213*          | 81.0                 | 452        | 3      |
|               |                | XPO1      | 2246G>A    | R749Q          | 51.0                 | 344        | 3      |
|               |                | ARID1A    | 5299G>T    | E1767*         | 26.0                 | 477        | 3      |
|               |                | ATM       | 392C>A     | S131*          | 18.0                 | 343        | 3      |
|               |                | ATRX      | 1753G>T    | E585*          | 71.0                 | 304        | N/A    |
|               |                | BCORL1    | 3757G>T    | E1253*         | 22.0                 | 427        | N/A    |
|               |                | EZH2      | 736G>T     | E246*          | 43.0                 | 276        | 2      |

| Sample        | Sample Metrics |            |                |                      |            |        |  |
|---------------|----------------|------------|----------------|----------------------|------------|--------|--|
|               | Gene           | CDS Effect | Protein Effect | Allele Frequency (%) | Read Depth | Ploidy |  |
| LN Metastasis | FAT1           | 9568G>T    | E3190*         | 24.0                 | 505        | 3      |  |
|               | FAT1           | 2518G>T    | E840*          | 22.0                 | 492        | 3      |  |
|               | LRP1B          | 13750G>T   | E4584*         | 48.0                 | 354        | 3      |  |
|               | LRP1B          | 10282G>T   | E3428*         | 50.0                 | 350        | 3      |  |
|               | NOTCH2         | 1489G>T    | E497*          | 48.0                 | 429        | 3      |  |
|               | SPEN           | 3127G>T    | E1043*         | 23.0                 | 428        | 3      |  |
|               | STAG2          | 3625G>T    | E1209*         | 47.0                 | 414        | N/A    |  |
|               | ABL1           | 1238A>G    | Y413C          | 54.0                 | 428        | 3      |  |
|               | ABL2           | 3155T>C    | V1052A         | 49.0                 | 571        | 3      |  |
|               | ALK            | 4526C>T    | S1509F         | 26.0                 | 617        | 3      |  |
|               | ALK            | 587C>T     | S196L          | 31.0                 | 438        | 3      |  |
|               | ARID1B         | 4685T>C    | L1562P         | 20.0                 | 844        | 5      |  |
|               | ARID2          | 428G>A     | R143H          | 24.0                 | 270        | 3      |  |
|               | ARID2          | 881G>T     | R294I          | 29.0                 | 586        | 3      |  |
|               | ARID2          | 4446A>C    | Q1482H         | 25.0                 | 576        | 3      |  |
|               | ARID2          | 4712A>G    | E1571G         | 21.0                 | 388        | 3      |  |
|               | ATM            | 3256C>T    | R1086C         | 49.0                 | 504        | 3      |  |
|               | ATM            | 7547T>G    | F2516C         | 8.0                  | 331        | 3      |  |
|               | ATR            | 7573C>T    | P2525S         | 20.0                 | 403        | 4      |  |
|               | ATR            | 7088G>A    | R2363Q         | 17.0                 | 428        | 4      |  |
|               | ATR            | 3113C>A    | S1038Y         | 37.0                 | 378        | 4      |  |
|               | AXL            | 809G>A     | G270D          | 26.0                 | 367        | 3      |  |
|               | BCORL1         | 61C>T      | R21C           | 29.0                 | 490        | N/A    |  |
|               | BCORL1         | 4313T>G    | V1438G         | 23.0                 | 345        | N/A    |  |
|               | BLM            | 572G>T     | R191I          | 49.0                 | 461        | 3      |  |
|               | BRCA1          | 4703T>G    | I1568S         | 15.0                 | 441        | 3      |  |
|               | BRCA2          | 2699A>T    | N900I          | 48.0                 | 398        | 3      |  |
|               | BRCA2          | 7241_      |                |                      |            |        |  |
|               | BRCA2          | 7242CA>TG  | S2414L         | 27.0                 | 591        | 3      |  |
|               | BRD4           | 2152G>A    | E718K          | 31.0                 | 500        | 3      |  |
|               | BRIP1          | 3516A>C    | E1172D         | 25.0                 | 496        | 3      |  |
|               | BRIP1          | 395C>A     | T132N          | 29.0                 | 455        | 3      |  |
|               | BRIP1          | 237A>C     | K79N           | 8.0                  | 395        | 3      |  |
|               | BTK            | 1574G>A    | R525Q          | 50.0                 | 375        | N/A    |  |

| Sample        | Sample Metrics |            |                |                      |            |        |  |
|---------------|----------------|------------|----------------|----------------------|------------|--------|--|
|               | Gene           | CDS Effect | Protein Effect | Allele Frequency (%) | Read Depth | Ploidy |  |
| LN Metastasis | C17orf39       | 637A>C     | K213Q          | 27.0                 | 325        | 3      |  |
|               | CARD11         | 1823G>A    | R608H          | 45.0                 | 249        | 2      |  |
|               | CBFB           | 323T>C     | V108A          | 28.0                 | 387        | 3      |  |
|               | CBFB           | 532T>G     | L178V          | 56.0                 | 387        | 3      |  |
|               | CBL            | 538C>T     | R180W          | 23.0                 | 490        | 3      |  |
|               | CD79A          | 240C>A     | F80L           | 26.0                 | 454        | 3      |  |
|               | CDC73          | 352C>A     | L118I          | 22.0                 | 369        | 3      |  |
|               | CHD2           | 4255a>G    | K1419E         | 5.0                  | 348        | 3      |  |
|               | CRKL           | 832G>A     | E278K          | 26.0                 | 422        | 3      |  |
|               | CSF1R          | 2092G>A    | D698N          | 32.0                 | 288        | 2      |  |
|               | CTCF           | 229A>C     | K77Q           | 55.0                 | 307        | 3      |  |
|               | CTNNA1         | 1178C>A    | S393Y          | 41.0                 | 285        | 2      |  |
|               | CUL3           | 2092G>A    | D698N          | 23.0                 | 523        | 3      |  |
|               | CUL3           | 577T>G     | L193V          | 53.0                 | 406        | 3      |  |
|               | DICER1         | 2119G>A    | E707K          | 5.0                  | 297        | 2      |  |
|               | EP300          | 3600C>A    | F1200L         | 26.0                 | 617        | 3      |  |
|               | EPHA3          | 1375G>T    | E459*          | 42.0                 | 552        | 4      |  |
|               | EPHA3          | 1600T>C    | Y534H          | 41.0                 | 297        | 4      |  |
|               | EPHA3          | 2427T>G    | S809R          | 17.0                 | 643        | 4      |  |
|               | EPHA3          | 2912C>A    | A971D          | 24.0                 | 462        | 4      |  |
|               | EPHB1          | 2608C>T    | R870W          | 44.0                 | 610        | 4      |  |
|               | ERG            | 913A>C     | N305H          | 24.0                 | 441        | 3      |  |
|               | EZH2           | 1983A>C    | K661N          | 33.0                 | 249        | 2      |  |
|               | FAM123B        | 2677A>C    | S893R          | 7.0                  | 382        | N/A    |  |
|               | FAM46C         | 242T>C     | V81A           | 54.0                 | 493        | 3      |  |
|               | FANCC          | 1643G>A    | R548Q          | 58.0                 | 405        | 3      |  |
|               | FANCC          | 390A>C     | E130D          | 28.0                 | 303        | 3      |  |
|               | FANCC          | 301G>A     | E101K          | 32.0                 | 374        | 3      |  |
|               | FANCG          | 706G>A     | A236T          | 24.0                 | 430        | 3      |  |
|               | FANCL          | 883C>T     | R295C          | 52.0                 | 486        | 3      |  |
|               | FAT1           | 1090C>A    | P364T          | 57.0                 | 802        | 3      |  |
|               | FGF23          | 750C>A     | F250L          | 49.0                 | 314        | 3      |  |
|               | FGF3           | 323C>T     | S108L          | 57.0                 | 516        | 3      |  |
|               | FGF6           | 35C>T      | S12F           | 58.0                 | 304        | 3      |  |
|               | FGFR1          | 34G>A      | E12K           | 52.0                 | 701        | 5      |  |

| Sample        | Sample Metrics |            |                |                      |            |        |  |
|---------------|----------------|------------|----------------|----------------------|------------|--------|--|
|               | Gene           | CDS Effect | Protein Effect | Allele Frequency (%) | Read Depth | Ploidy |  |
| LN Metastasis | FGFR2          | 1142A>C    | Y381S          | 33.0                 | 533        | 4      |  |
|               | FH             | 1495G>A    | E499K          | 25.0                 | 469        | 3      |  |
|               | FLT1           | 1163A>G    | Y388C          | 29.0                 | 411        | 3      |  |
|               | FLT3           | 2437G>A    | A813T          | 25.0                 | 337        | 3      |  |
|               | FLT3           | 2417C>T    | S806L          | 53.0                 | 235        | 3      |  |
|               | FLT3           | 2127A>T    | K709N          | 28.0                 | 352        | 3      |  |
|               | FLT4           | 3203A>G    | Y1068C         | 41.0                 | 268        | 2      |  |
|               | FRS2           | 455G>A     | R152Q          | 29.0                 | 419        | 3      |  |
|               | GABRA6         | 1127C>A    | S376Y          | 9.0                  | 321        | 2      |  |
|               | GNAS           | 811A>G     | T271A          | 52.0                 | 429        | 3      |  |
|               | GNAS           | 833C>T     | P278L          | 25.0                 | 449        | 3      |  |
|               | GNAS           | 595C>T     | R199C          | 27.0                 | 514        | 3      |  |
|               | GPR124         | 401T>G     | L134R          | 71.0                 | 568        | 5      |  |
|               | GSK3B          | 95A>G      | K32R           | 23.0                 | 537        | 4      |  |
|               | HGF            | 494C>T     | S165L          | 33.0                 | 287        | 2      |  |
|               | HGF            | 107G>T     | R36I           | 24.0                 | 204        | 2      |  |
|               | IKZF1          | 1300G>A    | A434T          | 43.0                 | 224        | 2      |  |
|               | INPP4B         | 1172A>C    | E391A          | 24.0                 | 388        | 3      |  |
|               | IRS2           | 1564G>A    | E522K          | 21.0                 | 480        | 3      |  |
|               | JAK1           | 940G>A     | E314K          | 28.0                 | 520        | 3      |  |
|               | JAK3           | 118C>T     | R40C           | 29.0                 | 368        | 3      |  |
|               | KDM5A          | 1187G>A    | R396Q          | 51.0                 | 367        | 3      |  |
|               | KDR            | 504G>T     | K168N          | 60.0                 | 403        | 3      |  |
|               | KDR            | 281T>G     | I94S           | 7.0                  | 558        | 3      |  |
|               | KEL            | 1307G>A    | R436Q          | 43.0                 | 257        | 2      |  |
|               | KEL            | 1289C>T    | A430V          | 31.0                 | 272        | 2      |  |
|               | KLHL6          | 1804G>A    | V602I          | 42.0                 | 428        | 4      |  |
|               | KLHL6          | 518A>G     | N173S          | 20.0                 | 761        | 4      |  |
|               | LRP1B          | 11042G>A   | C3681Y         | 48.0                 | 273        | 3      |  |
|               | LRP1B          | 4367G>T    | G1456V         | 51.0                 | 395        | 3      |  |
|               | LRP1B          | 1505G>A    | R502H          | 52.0                 | 615        | 3      |  |
|               | LRP1B          | 121G>A     | D41N           | 53.0                 | 432        | 3      |  |
|               | LZTR1          | 1913G>A    | R638H          | 25.0                 | 354        | 3      |  |
|               | MAGI2          | 1370C>T    | P457L          | 36.0                 | 464        | 2      |  |
|               | MAP3K1         | 2816C>G    | S939C          | 60.0                 | 252        | 3      |  |

| Sample        | Sample Metrics |            |                |                      |            |        |  |
|---------------|----------------|------------|----------------|----------------------|------------|--------|--|
|               | Gene           | CDS Effect | Protein Effect | Allele Frequency (%) | Read Depth | Ploidy |  |
| LN Metastasis | MDM4           | 139T>C     | F47L           | 29.0                 | 339        | 3      |  |
|               | MED12          | 884G>A     | R295H          | 6.0                  | 383        | N/A    |  |
|               | MET            | 684T>G     | F228L          | 36.0                 | 368        | 2      |  |
|               | MITF           | 1096G>T    | E366*          | 6.0                  | 623        | 4      |  |
|               | MLL2           | 9136G>A    | E3046K         | 52.0                 | 501        | 3      |  |
|               | MLL2           | 1023G>T    | E341D          | 49.0                 | 463        | 3      |  |
|               | MLL3           | 14417G>A   | R4806Q         | 30.0                 | 363        | 2      |  |
|               | MLL3           | 12026G>A   | S4009N         | 30.0                 | 432        | 2      |  |
|               | MLL3           | 5151A>C    | K1717N         | 26.0                 | 377        | 2      |  |
|               | MRE11A         | 1180G>T    | D394Y          | 25.0                 | 495        | 3      |  |
|               | MRE11A         | 764A>C     | K255T          | 7.0                  | 473        | 3      |  |
|               | NF1            | 1319G>A    | R440Q          | 24.0                 | 501        | 3      |  |
|               | NFE2L2         | 1657C>T    | R553C          | 50.0                 | 506        | 3      |  |
|               | NFE2L2         | 1447C>T    | R483W          | 49.0                 | 542        | 3      |  |
|               | NOTCH2         | 5470C>T    | R1824C         | 30.0                 | 222        | 3      |  |
|               | NOTCH3         | 467G>A     | R156Q          | 53.0                 | 391        | 3      |  |
|               | NTRK3          | 1753T>G    | F585V          | 48.0                 | 358        | 3      |  |
|               | NTRK3          | 878G>A     | S293N          | 32.0                 | 316        | 3      |  |
|               | PAK3           | 730T>C     | S244P          | 33.0                 | 414        | N/A    |  |
|               | PALB2          | 3122A>C    | K1041T         | 5.0                  | 345        | 3      |  |
|               | PDK1           | 1285G>T    | D429Y          | 27.0                 | 381        | 3      |  |
|               | PIK3CA         | 1943T>C    | L648S          | 25.0                 | 179        | 4      |  |
|               | PIK3R1         | 659T>C     | I220T          | 36.0                 | 260        | 2      |  |
|               | PLCG2          | 583G>T     | D195Y          | 50.0                 | 334        | 3      |  |
|               | PLCG2          | 892G>T     | E298*          | 54.0                 | 603        | 3      |  |
|               | PLCG2          | 2180G>A    | R727Q          | 17.0                 | 526        | 3      |  |
|               | PMS2           | 1883G>A    | R628Q          | 34.0                 | 312        | 2      |  |
|               | POLE           | 340C>T     | R114*          | 22.0                 | 556        | 3      |  |
|               | PRDM1          | 1294A>C    | N432H          | 9.0                  | 551        | 4      |  |
|               | PREX2          | 2974A>G    | I992V          | 69.0                 | 626        | 5      |  |
|               | PREX2          | 3886A>C    | N1296H         | 18.0                 | 756        | 5      |  |
|               | PRKCI          | 751C>T     | L251F          | 42.0                 | 595        | 4      |  |
|               | PRKDC          | 9115A>G    | T3039A         | 17.0                 | 399        | 5      |  |
|               | PRKDC          | 2530G>A    | E844K          | 17.0                 | 387        | 5      |  |
|               | PRKDC          | 265T>G     | L89V           | 17.0                 | 524        | 5      |  |

| Sample        | Sample Metrics |                      |                  |                      |            |          |  |
|---------------|----------------|----------------------|------------------|----------------------|------------|----------|--|
|               | Gene           | CDS Effect           | Protein Effect   | Allele Frequency (%) | Read Depth | Ploidy   |  |
| LN Metastasis | PRKDC          | 184G>T               | D62Y             | 51.0                 | 570        | 5        |  |
|               | QKI            | 942T>G               | I314M            | 86.0                 | 651        | 5        |  |
|               | RANBP2         | 3182G>A              | S1061N           | 30.0                 | 646        | 3        |  |
|               | RANBP2         | 8303_<br>8306delCAGA | T2768fs*3        | 24.0                 | 440        | 3        |  |
|               | RANBP2         | 8509A>G              | I2837V           | 27.0                 | 503        | 3        |  |
|               | RBM10          | 1556G>T              | G519V            | 10.0                 | 288        | N/A      |  |
|               | <b>RICTOR</b>  | <b>2138C&gt;G</b>    | <b>A713G</b>     | <b>34.0</b>          | <b>346</b> | <b>3</b> |  |
|               | ROS1           | 4906C>A              | L1636I           | 14.0                 | 766        | 5        |  |
|               | ROS1           | 4890T>G              | I1630M           | 16.0                 | 673        | 5        |  |
|               | ROS1           | 3252T>G              | I1084M           | 89.0                 | 781        | 5        |  |
|               | ROS1           | 3218A>C              | K1073T           | 31.0                 | 705        | 5        |  |
|               | ROS1           | 1079G>T              | R360I            | 32.0                 | 609        | 5        |  |
|               | RUNX1T1        | 533G>A               | R178K            | 8.0                  | 589        | 5        |  |
|               | SETD2          | 4198G>T              | D1400Y           | 26.0                 | 450        | 3        |  |
|               | SLIT2          | 3185G>T              | C1062F           | 28.0                 | 396        | 3        |  |
|               | SMAD3          | 108G>T               | K36N             | 16.0                 | 416        | 3        |  |
|               | SNCAIP         | 97C>T                | R33*             | 40.0                 | 415        | 2        |  |
|               | SPEN           | 2438A>C              | K813T            | 27.0                 | 503        | 3        |  |
|               | SPTA1          | 1408C>T              | R470C            | 28.0                 | 370        | 3        |  |
|               | SRC            | 1602G>T              | E534D            | 30.0                 | 359        | 3        |  |
|               | STAG2          | 2118G>T              | W706C            | 27.0                 | 362        | N/A      |  |
|               | STAG2          | 2797G>A              | E933K            | 24.0                 | 336        | N/A      |  |
|               | STAT4          | 214T>C               | S72P             | 56.0                 | 412        | 3        |  |
|               | TAF1           | 2990G>A              | R997H            | 70.0                 | 502        | N/A      |  |
|               | TGFBR2         | 159T>G               | F53L             | 27.0                 | 443        | 3        |  |
|               | TOP2A          | 3438G>T              | R1146S           | 21.0                 | 482        | 3        |  |
|               | XPO1           | 1658G>A              | R553H            | 54.0                 | 445        | 3        |  |
|               | ZNF217         | 2102C>A              | S701Y            | 28.0                 | 577        | 3        |  |
|               | Primary Cancer | <b>Tumor Purity</b>  |                  |                      |            |          |  |
|               |                | <b>Computational</b> | <b>Pathology</b> |                      |            |          |  |
| 50%           |                | 70%                  |                  |                      |            |          |  |
|               | ARID1A         | 5965C>T              | R1989*           | 42.0                 | 610        | 2        |  |

| Sample         | Sample Metrics |            |                |                      |            |        |  |
|----------------|----------------|------------|----------------|----------------------|------------|--------|--|
|                | Gene           | CDS Effect | Protein Effect | Allele Frequency (%) | Read Depth | Ploidy |  |
| Primary Cancer | ATR            | 2965C>T    | R989C          | 44.0                 | 485        | 2      |  |
|                | ATRX           | 3892G>T    | E1298*         | 37.0                 | 558        | 2      |  |
|                | BAP1           | 901G>A     | A301T          | 9.0                  | 362        | 2      |  |
|                | CTCF           | 145C>T     | R49C           | 4.0                  | 486        | 2      |  |
|                | CTNNB1         | 95A>G      | D32G           | 41.0                 | 654        | 2      |  |
|                | ERBB3          | 310G>T     | V104L          | 39.0                 | 537        | 2      |  |
|                | FAM123B        | 674G>T     | R225I          | 12.0                 | 441        | 2      |  |
|                | LRP1B          | 628A>C     | N210H          | 39.0                 | 527        | 2      |  |
|                | MAP2K1         | 199G>A     | D67N           | 43.0                 | 839        | 2      |  |
|                | MSH6           | 2765G>A    | R922Q          | 6.0                  | 657        | 2      |  |
|                | PIK3CA         | 263G>A     | R88Q           | 41.0                 | 793        | 2      |  |
|                | PIK3CA         | 333G>T     | K111N          | 41.0                 | 720        | 2      |  |
|                | PIK3CA         | 1070G>A    | R357Q          | 41.0                 | 408        | 2      |  |
|                | POLE           | 1231G>T    | V411L          | 40.0                 | 292        | 2      |  |
|                | PTEN           | 389G>A     | R130Q          | 44.0                 | 710        | 2      |  |
|                | SMAD2          | 962G>A     | R321Q          | 41.0                 | 476        | 2      |  |
|                | TAF1           | 3698G>A    | R1233Q         | 8.0                  | 678        | 2      |  |
|                | TP53           | 637C>T     | R213*          | 16.0                 | 541        | 2      |  |
|                | XPO1           | 2246G>A    | R749Q          | 40.0                 | 447        | 2      |  |
|                | ARID1A         | 5299G>T    | E1767*         | 44.0                 | 621        | 2      |  |
|                | ATRX           | 6736G>T    | E2246*         | 33.0                 | 491        | 2      |  |
|                | ATRX           | 1753G>T    | E585*          | 47.0                 | 670        | 2      |  |
|                | EZH2           | 736G>T     | E246*          | 41.0                 | 446        | 2      |  |
|                | FAT1           | 9568G>T    | E3190*         | 41.0                 | 538        | 2      |  |
|                | FAT1           | 2518G>T    | E840*          | 5.0                  | 747        | 2      |  |
|                | KIT            | 124G>T     | G42*           | 33.0                 | 815        | 2      |  |
|                | LRP1B          | 13750G>T   | E4584*         | 40.0                 | 485        | 2      |  |
|                | LRP1B          | 10282G>T   | E3428*         | 6.0                  | 478        | 2      |  |
|                | NOTCH2         | 1489G>T    | E497*          | 8.0                  | 594        | 2      |  |
|                | SPTA1          | 3136C>T    | R1046*         | 32.0                 | 532        | 2      |  |
|                | STAG2          | 3625G>T    | E1209*         | 6.0                  | 490        | 2      |  |
|                | ABL1           | 1238A>G    | Y413C          | 44.0                 | 563        | 2      |  |
|                | ABL2           | 3155T>C    | V1052A         | 7.0                  | 604        | 2      |  |
|                | ALK            | 587C>T     | S196L          | 45.0                 | 453        | 2      |  |
|                | ARID2          | 428G>A     | R143H          | 43.0                 | 329        | 2      |  |

| Sample         | Sample Metrics |                    |                |                      |            |        |  |
|----------------|----------------|--------------------|----------------|----------------------|------------|--------|--|
|                | Gene           | CDS Effect         | Protein Effect | Allele Frequency (%) | Read Depth | Ploidy |  |
| Primary Cancer | ARID2          | 4446A>C            | Q1482H         | 43.0                 | 623        | 2      |  |
|                | ATM            | 3256C>T            | R1086C         | 8.0                  | 623        | 2      |  |
|                | ATR            | 3113C>A            | S1038Y         | 9.0                  | 391        | 2      |  |
|                | ATRX           | 3155A>C            | K1052T         | 7.0                  | 718        | 2      |  |
|                | BCORL1         | 61C>T              | R21C           | 37.0                 | 442        | 2      |  |
|                | BCORL1         | 4808A>G            | K1603R         | 31.0                 | 359        | 2      |  |
|                | BLM            | 572G>T             | R191I          | 9.0                  | 713        | 2      |  |
|                | BRCA2          | 2699A>T            | N900I          | 42.0                 | 662        | 2      |  |
|                | BRCA2          | 7241_<br>7242CA>TG | S2414L         | 44.0                 | 939        | 2      |  |
|                | BRD4           | 2152G>A            | E718K          | 13.0                 | 320        | 2      |  |
|                | BTK            | 1574G>A            | R525Q          | 9.0                  | 454        | 2      |  |
|                | CARD11         | 1823G>A            | R608H          | 52.0                 | 376        | 2      |  |
|                | CBFB           | 532T>G             | L178V          | 45.0                 | 457        | 2      |  |
|                | CBL            | 538C>T             | R180W          | 41.0                 | 573        | 2      |  |
|                | CDK12          | 3728G>T            | R1243I         | 6.0                  | 518        | 2      |  |
|                | CHD4           | 2521G>A            | A841T          | 36.0                 | 428        | 2      |  |
|                | CHEK2          | 1392G>T            | K464N          | 8.0                  | 218        | 2      |  |
|                | CRKL           | 832G>A             | E278K          | 10.0                 | 471        | 2      |  |
|                | CSF1R          | 1660G>A            | E554K          | 32.0                 | 380        | 2      |  |
|                | CTCF           | 229A>C             | K77Q           | 8.0                  | 393        | 2      |  |
|                | CTNNA1         | 210G>T             | E70D           | 7.0                  | 717        | 2      |  |
|                | CTNNA1         | 1178C>A            | S393Y          | 41.0                 | 473        | 2      |  |
|                | CUL3           | 2092G>A            | D698N          | 45.0                 | 615        | 2      |  |
|                | CUL3           | 577T>G             | L193V          | 42.0                 | 450        | 2      |  |
|                | EPHA3          | 1375G>T            | E459*          | 43.0                 | 549        | 2      |  |
|                | EPHA3          | 1600T>C            | Y534H          | 45.0                 | 328        | 2      |  |
|                | EPHB1          | 2608C>T            | R870W          | 47.0                 | 485        | 2      |  |
|                | EZH2           | 1983A>C            | K661N          | 41.0                 | 368        | 2      |  |
|                | FAM46C         | 242T>C             | V81A           | 8.0                  | 468        | 2      |  |
|                | FANCC          | 1643G>A            | R548Q          | 8.0                  | 362        | 2      |  |
|                | FANCE          | 718G>A             | E240K          | 6.0                  | 627        | 2      |  |
|                | FANCG          | 706G>A             | A236T          | 41.0                 | 380        | 2      |  |
|                | FANCL          | 883C>T             | R295C          | 9.0                  | 667        | 2      |  |
|                | FAT1           | 1090C>A            | P364T          | 42.0                 | 890        | 2      |  |



| Sample         | Sample Metrics |            |                |                      |            |        |  |
|----------------|----------------|------------|----------------|----------------------|------------|--------|--|
|                | Gene           | CDS Effect | Protein Effect | Allele Frequency (%) | Read Depth | Ploidy |  |
| Primary Cancer | FGF23          | 750C>A     | F250L          | 35.0                 | 298        | 2      |  |
|                | FGF3           | 323C>T     | S108L          | 46.0                 | 500        | 2      |  |
|                | FGF6           | 35C>T      | S12F           | 49.0                 | 260        | 2      |  |
|                | FH             | 1495G>A    | E499K          | 9.0                  | 576        | 2      |  |
|                | FLT3           | 2437G>A    | A813T          | 43.0                 | 450        | 2      |  |
|                | FLT3           | 2417C>T    | S806L          | 13.0                 | 454        | 2      |  |
|                | FLT4           | 3203A>G    | Y1068C         | 42.0                 | 365        | 2      |  |
|                | FRS2           | 455G>A     | R152Q          | 47.0                 | 554        | 2      |  |
|                | GATA6          | 457G>A     | A153T          | 37.0                 | 181        | 2      |  |
|                | GNAS           | 811A>G     | T271A          | 9.0                  | 380        | 2      |  |
|                | GPR124         | 401T>G     | L134R          | 48.0                 | 462        | 2      |  |
|                | GRIN2A         | 1548G>T    | E516D          | 25.0                 | 608        | 2      |  |
|                | H3F3A          | 371A>G     | D124G          | 33.0                 | 237        | 2      |  |
|                | IKZF1          | 1300G>A    | A434T          | 9.0                  | 263        | 2      |  |
|                | IRF4           | 850G>A     | A284T          | 41.0                 | 378        | 2      |  |
|                | JAK1           | 2002G>T    | E668*          | 31.0                 | 433        | 2      |  |
|                | JAK1           | 1339G>T    | E447*          | 35.0                 | 422        | 2      |  |
|                | JAK2           | 3182T>G    | F1061C         | 32.0                 | 548        | 2      |  |
|                | KDM5A          | 1187G>A    | R396Q          | 39.0                 | 605        | 2      |  |
|                | KDR            | 504G>T     | K168N          | 6.0                  | 544        | 2      |  |
|                | KEL            | 1307G>A    | R436Q          | 41.0                 | 450        | 2      |  |
|                | KEL            | 1289C>T    | A430V          | 6.0                  | 420        | 2      |  |
|                | KLHL6          | 1804G>A    | V602I          | 11.0                 | 305        | 2      |  |
|                | LRP1B          | 11042G>A   | C3681Y         | 42.0                 | 433        | 2      |  |
|                | LRP1B          | 4247C>A    | T1416N         | 35.0                 | 624        | 2      |  |
|                | LRP1B          | 1505G>A    | R502H          | 40.0                 | 881        | 2      |  |
|                | LRP1B          | 121G>A     | D41N           | 9.0                  | 538        | 2      |  |
|                | MAGI2          | 1370C>T    | P457L          | 44.0                 | 763        | 2      |  |
|                | MAP3K1         | 2816C>G    | S939C          | 49.0                 | 302        | 2      |  |
|                | MED12          | 884G>A     | R295H          | 34.0                 | 496        | 2      |  |
|                | MED12          | 3050G>A    | W1017*         | 26.0                 | 498        | 2      |  |
|                | MET            | 684T>G     | F228L          | 7.0                  | 642        | 2      |  |
|                | MLH1           | 1643A>G    | Y548C          | 33.0                 | 601        | 2      |  |
|                | MLL2           | 9136G>A    | E3046K         | 43.0                 | 602        | 2      |  |
| MLL2           | 1023G>T        | E341D      | 9.0            | 451                  | 2          |        |  |

| Sample         | Sample Metrics |                   |                |                      |            |          |  |
|----------------|----------------|-------------------|----------------|----------------------|------------|----------|--|
|                | Gene           | CDS Effect        | Protein Effect | Allele Frequency (%) | Read Depth | Ploidy   |  |
| Primary Cancer | MLL3           | 6251A>C           | N2084T         | 8.0                  | 677        | 2        |  |
|                | MLL3           | 1528G>T           | E510*          | 34.0                 | 576        | 2        |  |
|                | MLL3           | 910_911insA       | M305fs*28      | 5.0                  | 2015       | 2        |  |
|                | NFE2L2         | 1657C>T           | R553C          | 44.0                 | 738        | 2        |  |
|                | NFE2L2         | 1447C>T           | R483W          | 41.0                 | 849        | 2        |  |
|                | NOTCH2         | 5470C>T           | R1824C         | 10.0                 | 257        | 2        |  |
|                | NOTCH3         | 467G>A            | R156Q          | 43.0                 | 366        | 2        |  |
|                | NTRK1          | 1525G>T           | D509Y          | 11.0                 | 374        | 2        |  |
|                | NTRK3          | 1753T>G           | F585V          | 38.0                 | 454        | 2        |  |
|                | PAK3           | 730T>C            | S244P          | 38.0                 | 484        | 2        |  |
|                | PDGFRA         | 910A>G            | K304E          | 35.0                 | 644        | 2        |  |
|                | PDK1           | 1285G>T           | D429Y          | 45.0                 | 428        | 2        |  |
|                | PIK3CA         | 184C>A            | L62I           | 5.0                  | 750        | 2        |  |
|                | PIK3R1         | 659T>C            | I220T          | 42.0                 | 518        | 2        |  |
|                | PLCG2          | 583G>T            | D195Y          | 7.0                  | 498        | 2        |  |
|                | PLCG2          | 892G>T            | E298*          | 10.0                 | 535        | 2        |  |
|                | PLCG2          | 2972G>T           | R991I          | 36.0                 | 517        | 2        |  |
|                | PMS2           | 1883G>A           | R628Q          | 44.0                 | 503        | 2        |  |
|                | POLE           | 340C>T            | R114*          | 42.0                 | 667        | 2        |  |
|                | PREX2          | 3886A>C           | N1296H         | 5.0                  | 660        | 2        |  |
|                | PRKCI          | 751C>T            | L251F          | 44.0                 | 601        | 2        |  |
|                | PRKDC          | 9115A>G           | T3039A         | 39.0                 | 342        | 2        |  |
|                | QKI            | 942T>G            | I314M          | 9.0                  | 565        | 2        |  |
|                | RANBP2         | 3182G>A           | S1061N         | 43.0                 | 719        | 2        |  |
|                | RANBP2         | 4493A>C           | K1498T         | 6.0                  | 834        | 2        |  |
|                |                | 8303_             |                |                      |            |          |  |
|                | RANBP2         | 8306delCAGA       | T2768fs*3      | 37.0                 | 529        | 2        |  |
|                | RANBP2         | 8509A>G           | I2837V         | 7.0                  | 700        | 2        |  |
|                | <b>RICTOR</b>  | <b>2138C&gt;G</b> | <b>A713G</b>   | <b>49.0</b>          | <b>488</b> | <b>2</b> |  |
|                | ROS1           | 5027G>T           | W1676L         | 47.0                 | 676        | 2        |  |
|                | ROS1           | 4015G>A           | A1339T         | 38.0                 | 624        | 2        |  |
|                | ROS1           | 3252T>G           | I1084M         | 45.0                 | 801        | 2        |  |
|                | ROS1           | 734G>A            | R245K          | 9.0                  | 580        | 2        |  |
|                | RUNX1T1        | 1625A>C           | K542T          | 33.0                 | 513        | 2        |  |

| Sample         | Sample Metrics |         |            |                |                      |            |        |
|----------------|----------------|---------|------------|----------------|----------------------|------------|--------|
|                |                | Gene    | CDS Effect | Protein Effect | Allele Frequency (%) | Read Depth | Ploidy |
| Primary Cancer |                | SETD2   | 4198G>T    | D1400Y         | 7.0                  | 595        | 2      |
|                |                | SETD2   | 3389A>C    | K1130T         | 37.0                 | 724        | 2      |
|                |                | SNCAIP  | 97C>T      | R33*           | 7.0                  | 681        | 2      |
|                |                | SNCAIP  | 2579C>A    | P860H          | 8.0                  | 770        | 2      |
|                |                | SPTA1   | 1408C>T    | R470C          | 46.0                 | 411        | 2      |
|                |                | STAG2   | 2118G>T    | W706C          | 37.0                 | 470        | 2      |
|                |                | STAT4   | 214T>C     | S72P           | 43.0                 | 581        | 2      |
|                |                | TAF1    | 2990G>A    | R997H          | 53.0                 | 729        | 2      |
|                |                | TNFAIP3 | 1784C>T    | A595V          | 45.0                 | 548        | 2      |
|                |                | XPO1    | 1658G>A    | R553H          | 41.0                 | 557        | 2      |

<sup>A</sup>Potentially pathogenic variants are listed first followed by VUS for each sample. Variants that were also present in germline sequencing are shown highlighted in blue. VUS - variant of unknown significance; CDS - coding DNA sequence; LN - lymph node.

## Supplemental Methods

Data Collection and Analysis of mRNA expression: mRNA expression data of all endometrioid samples were obtained from Broad GDAC firehose (<http://firebrowse.org/?cohort=UCEC>) in the form of RNAseqV2 scaled estimates. Within each sample, median of all genes were set to 1 to eliminate systematic error. CIBERSORT was then used to estimate leukocyte composition of the immune infiltrate in the tumor (23). If CIBERSORT was not confident ( $p \geq 0.05$ ) about the leukocyte composition of a sample, then leukocyte composition of that sample was not used in this study. mRNA expression was then normalized as  $\log_2(1+1023 \times \text{median adjusted scaled estimate})$ . Somatic mutation data and clinical data (including micro-satellite status) were obtained from TCGA (<https://tcga-data.nci.nih.gov/tcga/tcgaDownload.jsp>). All mutation annotation files (as of 30th September, 2015) for endometrioid samples were merged removing duplicate records, and then annotated using Oncotator (<https://www.broadinstitute.org/oncotator/>). Endometrioid samples were classified into 3 groups: (i) POLE (samples with non-synonymous somatic mutation in POLE), (ii) MSI (samples with micro-satellite instability, but no non-synonymous somatic mutation in POLE), (iii) MSS (micro-satellite stable samples, but no non-synonymous somatic mutation in POLE). We compared the expression of ~700 immune genes between the 3 groups (Wilcoxon Rank Sum test followed by Benjamini Hochberg correction for multiple hypothesis testing); 16 genes were differentially expressed between POLE and MSI at  $FDR < 0.25$  and 111 genes were differentially expressed between POLE and MSS at  $FDR < 0.05$ . In the heat map shown in Fig. 2B, the expression levels of each of these differentially expressed genes (119 genes in total) are represented: the 25% of samples with the highest expression levels are shown in red; the 25% of samples with the lowest expression levels are shown in green; and the 50% of samples with intermediate expression levels are shown in black.

Analysis of histological images: High resolution digital images of H&E stained formalin-fixed

paraffin-embedded sections of endometrial cancer from the TCGA dataset were analyzed by a clinical pathologist (HZ) blinded to genomic data. Each image was scored for the presence of lymphocytes on a scale of 1 (minimal) to 3 (robust). Statistical significance of distribution of scores in each category was evaluated by the two-sided Wilcoxon Rank Sum test.
